# Supplementary material for: Enhanced Bacitracin Production by Systematically Engineering S-Adenosylmethionine Supply Modules in Bacillus licheniformis
Source: PubMed Central journal article supplement (PMC7155746; doi:10.3389/fbioe.2020.00305), 2020-04-07

# **Enhanced bacitracin production by systematically engineering S-adenosylmethionine supply modules in *Bacillus licheniformis***

Running title: Enhancing bacitracin production in *B. licheniformis*

Dongbo Cai <sup>a</sup>, Bowen Zhang <sup>a</sup>, Jiang Zhu <sup>a</sup>, Haixia Xu <sup>a</sup>, Pei Liu <sup>a</sup>, Zhi Wang <sup>b</sup>, Junhui Li <sup>c</sup>,  
Zhifan Yang <sup>a\*</sup>, Xin Ma <sup>a</sup>, Shouwen Chen <sup>a\*</sup>

<sup>a</sup> *State Key Laboratory of Biocatalysis and Enzyme Engineering, Environmental Microbial Technology*

*Center of Hubei Province, College of Life Sciences, Hubei University, Wuhan, 430062, PR China*

<sup>b</sup> *Hubei Provincial Key Laboratory of Industrial Microbiology, Key Laboratory of*

*Fermentation Engineering (Ministry of Education), School of food and biological engineering,*

*Hubei University of Technology, Wuhan 430068, Hubei, China*

<sup>c</sup> *Lifecome Biochemistry Co. Ltd, Nanping, 353400, PR China*

\*Corresponding author: Prof. Zhifan Yang and Shouwen Chen

Tel./fax.: +86 027-88666081.

*E-mail address:* [sailyangzhf@hubu.edu.cn](mailto:sailyangzhf@hubu.edu.cn) and [mel212@126.com](mailto:mel212@126.com) (S. Chen).

*Postal address:* 368 Youyi Avenue, Wuchang District, Wuhan 430062, Hubei, PR China

**Table S1** The primers used in this research

| Primer names          | Sequences (from 3' to 5')                     |
|-----------------------|-----------------------------------------------|
| pHY-F                 | GTTTATTATCCATACCCTTAC                         |
| pHY-R                 | CAGATTTCGTGATGCTTGTC                          |
| T2-F                  | ATGTGATAACTCGGCGTA                            |
| T2-R                  | GCAAGCAGCAGATTACGC                            |
| P43-F                 | CGGAATTC TGATAGGTGGTATGTTTTTCG                |
| P43-R                 | GTGTACATTCCTCTCTTACCTA                        |
| SAM2-F                | TAAGAGAGGAATGTACACATGTCCAAGAGCAAACTTTCT       |
| SAM2-R                | TCCGTCCTCTCTGCTCTTTTAAAATTCCAATTTCTTTGGT      |
| MetK <sub>Bl</sub> -F | TAAGAGAGGAATGTACACATGAGCAAAAACCGTCGGTTA       |
| MetK <sub>Bl</sub> -R | TCCGTCCTCTCTGCTCTTTTAAATTATTCTCCTAATGCATCTTTC |
| MetK <sub>Cg</sub> -F | TAAGAGAGGAATGTACAC                            |
| MetK <sub>Cg</sub> -R | TCCGTCCTCTCTGCTCTTT                           |
| TamyL-F               | AAGAGCAGAGAGGACGGATTC                         |
| TamyL-R               | GCTCTAGAGCCGCAATAATGCCGTCGCACTG               |
| SAM2-F1               | CGGGATCCCGTGAGGCGATGGATGTTCT                  |
| SAM2-R1               | CGAAAACATACCACCTATCATTGACGAACCGTATCCGC        |
| SAM2-F2               | GCGGATACGGTTCGTCAATGATAGGTGGTATGTTTTTCG       |
| SAM2-R2               | TCTTACCGTTTGCTGAGTGCGCAATAATGCCGTCGCACTGGC    |
| SAM2-F3               | GCCAGTGCGACGGCATTATTGCGCACTCAGCAAACGGTAAGA    |
| SAM2-R3               | GCTCTAGAGCTGTCAAACGCTCCGGTGG                  |
| SAM2-KYF              | AGCTTCAATGCTACCCAAGCAGC                       |
| SAM2-KYR              | GCCTTGTCTGAAATACATATA                         |
| MetH <sub>Bl</sub> -F | TAAGAGAGGAATGTACACATGACAAATGTAAAAACGAG        |
| MetH <sub>Bl</sub> -R | TCCGTCCTCTCTGCTCTTTTAAATTAACAGTCTGAGCGAGTTTG  |
| MetH <sub>Cg</sub> -F | TAAGAGAGGAATGTACACATGAGCCAGAACCGCATCAGGACC    |
| MetH <sub>Cg</sub> -R | TCCGTCCTCTCTGCTCTTTTATAGAACAGTTCCTTTGATGCAA   |
| Met6-F                | TAAGAGAGGAATGTACACATGGTTCAATCTGCTGTCTTA       |
| Met6-R                | TCCGTCCTCTCTGCTCTTTTAAATCTTGTATTGTTACGG       |
| PmetH-F1              | CGACTTCCGGGAGCGACTTC                          |
| PmetH-R1              | TGAATCTCGCCGAAATCGCAGGTTGTTTTCTCCTTTCTTTC     |
| PmetH-F2              | GAAAGAAAAGGAGAAAACAACCTGCGATTTCGGCGAGATTCA    |
| PmetH-R2              | CAGCTGGTCATTGATGTTAGACATATAAAAATTCTCCTTTTTGAT |
| PmetH-F3              | ATCAAAAAGGAGAATTTTTATATGTCTAACATCAATGACCAGCTG |
| PmetH-R3              | CCCATCGGTTTCGATCGTGCCCTGA                     |
| PmetH-KYF             | ATATGAGGTCGCTGATCCATATT                       |
| PmetH-KYR             | CTGACGGCCGTCCTCGCAAGGGAA                      |
| metN-F1               | GCTCTAGACACGAATCTGATTGACAA                    |
| metN-R1               | TCTGTAATCGTTCGGTGCCCATGCCGATCTTCCTTT          |
| metN-F2               | AAAGGAAGATCGGCATGGGCACGGAACGATTACAGA          |
| metN-R2               | GCGAGCTCAAACCTCAGCACAAGCGAACC                 |
| metN-KYF              | TTAAACGAAATTACAACCTGCTA                       |
| metN-KYR              | TAGCCGTATGTGATCGCC                            |

---

|            |                                              |
|------------|----------------------------------------------|
| metP-F1    | GCTCTAGACGGAGGTTCTGCTCTGTG                   |
| metP-R1    | AACTCAGCACAAGCGAACGACGAGCCTTGCGATGTA         |
| metP-F2    | TACATCGCAAGGCTCGTCGTTGCTGTGCTGAGTT           |
| metP-R2    | GCGAGCTCTTGGCGTCAATGTCACCG                   |
| metP-KYF   | CGGAGGTTCTGCTCTGTG                           |
| metP-KYR   | ACCGCTATGCCGTTGTTG                           |
| metN-F     | TAAGAGAGGAATGTACACATGATTACATTTGAAGGCGTTGAA   |
| metN-R     | TCCGTCCTCTCTGCTCTTTTAATTATACCTCCCTGATGCGAATG |
| metP-F     | TAAGAGAGGAATGTACACATGTTTGA AAAACTGTTTCCAA    |
| metP-R     | TCCGTCCTCTCTGCTCTTTTACTCAGAAACAGAAATGACA     |
| PmetPQ-F1  | GCTCTAGATCAGGCACGGTTGAAGTA                   |
| PmetPQ-R1  | TCTCGCCGAAATCGCAGGATGCTTCAGCGTTTCCTGT        |
| PmetPQ-F2  | ACAGGAAACGCTGAAGCATCCTGCGATTTCCGGCAGA        |
| PmetPQ-R2  | CTTCCACAGCTGCTCCATATAAAAATTCTCCTTTTTGAT      |
| PmetPQ-F3  | ATCAAAAAGGAGAATTTTTATATGGAGCAGCTGTGGGAAG     |
| PmetPQ-R3  | GCGAGCTCGCCGTTTACATAGGCAAGG                  |
| PmetPQ-KYF | AGTGCCCTATGAAACCCG                           |
| PmetPQ-KYR | AGCGGCTTTGCTTCTTCA                           |
| speD-F1    | GCTCTAGAGTTGACCTTGTTGGCTGAT                  |
| speD-R1    | AATCGGCAGCTACGTTCCGATCCCCACAGTTCGGAGATA      |
| speD-F2    | TATCTCCGAACTGTGGGGGATCCGAACGTAGCTGCCGAT      |
| speD-R2    | GCGAGCTCCTTCCAGCACTTCCTTTAC                  |
| speD-KYF   | GGAAGAATGCACGGCCTGGC                         |
| speD-KYR   | CTCCTCTTTCTTCCGACACC                         |
| mtnN-F1    | GCTCTAGACGGAAAGGGAGTCACAGG                   |
| mtnN-R1    | TGATAGGAAACCTGTGCGATTGACTTTGCCGATGCC         |
| mtnN-F2    | GGCATCGGCAAAGTCAATCGCACAGGTTTCCTATCA         |
| mtnN-R2    | GCGAGCTCATCGCACCCCTTCATTCCG                  |
| mtnN-KYF   | CGGGTGACAAGGGAAATA                           |
| mtnN-KYR   | TTATGTCCGTGCGGTTCT                           |
| RT-bacA-F  | GTATCTGCCGATCGACCCTG                         |
| RT-bacA-R  | TCACAATCGATTCCGTCGCG                         |
| RT-bacT-F  | ACTATCAAATGAGCGGGGCG                         |
| RT-bacT-R  | GGATTGGGCAAGGTATGCAG                         |
| RT-bacB-F  | GGACGAATCAGGCGAGAGAG                         |
| RT-bacB-R  | GGACGAATCAGGCGAGAGAG                         |
| RT-bacC-F  | GGACGAATCAGGCGAGAGAG                         |
| RT-bacC-R  | TGATCTTCCCTTCGCCACCAC                        |
| RT-abrB-F  | CTAGGACGCGTGGTGATTCC                         |
| RT-abrB-R  | CCAATTTACCGCCTGCAAGT                         |

---

**Fig. S1** Effects of SAM addition on the cell growth of *B. licheniformis*.

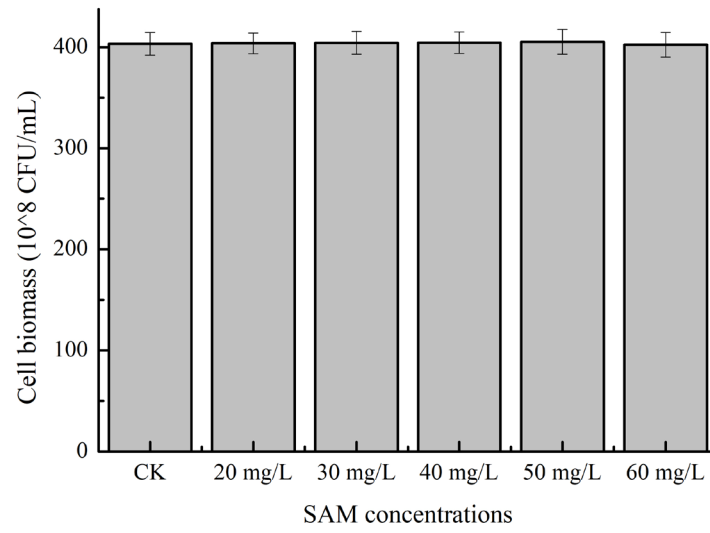

**Fig. S2** The concentrations of intracellular Met and SAM before (24 h) and after (30 h) SAM addition.

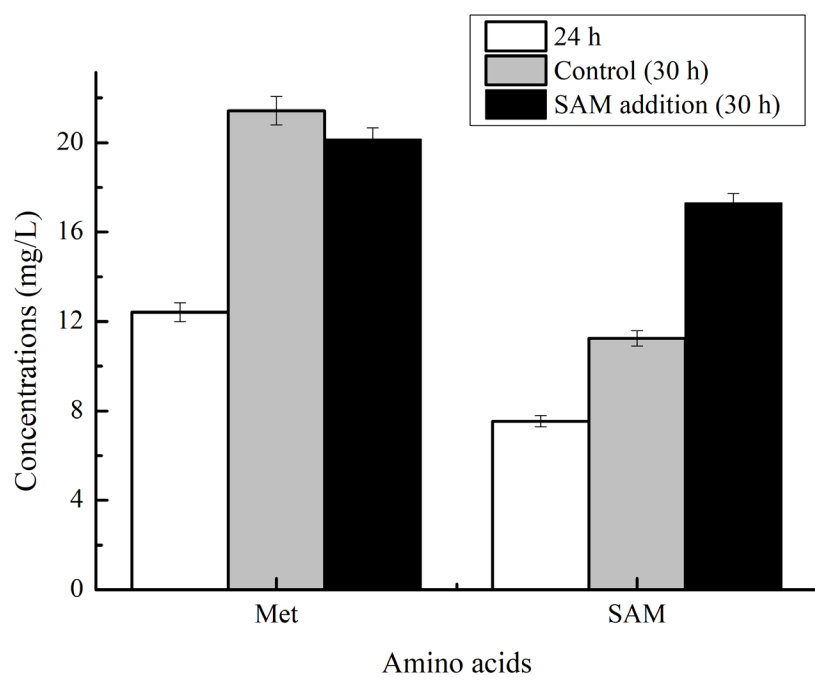

Fig.S3 Effects of SAM addition on the transcriptional level of regulator gene *abrB*.

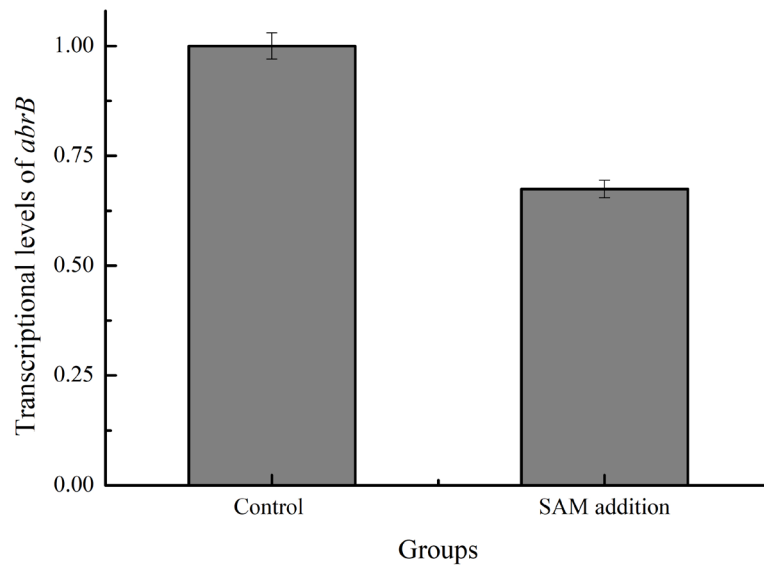

Supplement: Data_Sheet_1.pdf [file Data_Sheet_1.pdf]
